# Supplementary material for: Distinct roles of presynaptic dopamine receptors in the differential modulation of the intrinsic synapses of medium-spiny neurons in the nucleus accumbens
Source: PubMed Central journal article supplement (PMC1783657; doi:10.1186/1471-2202-8-8), 2007-01-19

A1

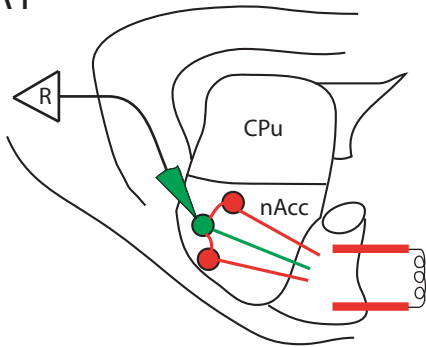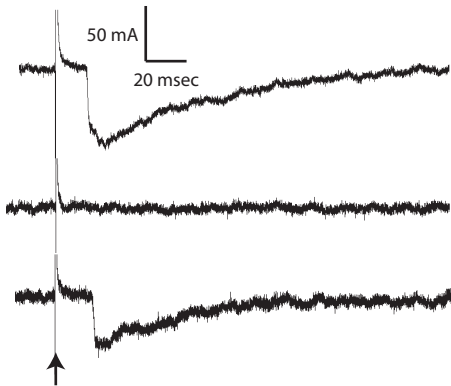

Supplement: 1471-2202-8-8-S1.pdf [file 1471-2202-8-8-S1.pdf]
