# Supplementary material for: Distinct roles of presynaptic dopamine receptors in the differential modulation of the intrinsic synapses of medium-spiny neurons in the nucleus accumbens
Source: Springer Nature journal article supplement (doi:10.1186/1471-2202-8-8), 2007-01-19

# A2

## SKF81297

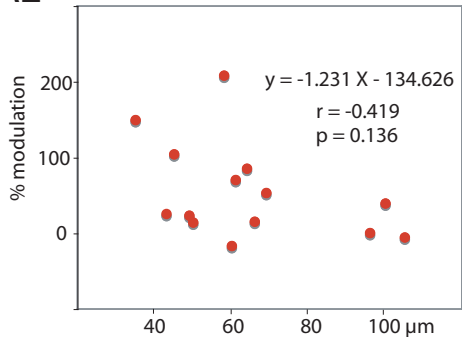

## quinpirole

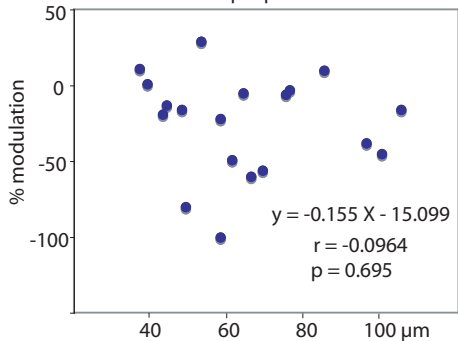

Supplement: 12868_2006_306_MOESM2_ESM.pdf [file 12868_2006_306_MOESM2_ESM.pdf]
